# Supplementary material for: Leaf Biochemistry Parameters Estimation of Vegetation Using the Appropriate Inversion Strategy
Source: Front Plant Sci. 2020 May 20;11:533. doi: 10.3389/fpls.2020.00533 (PMC7326141; doi:10.3389/fpls.2020.00533)
Supplement: Supplementary file 3 [file Data_Sheet_1.docx]

**Support: Table 4**

The corresponding RMSE for Table 4 in manuscript.

|  | Separated | | Together | | Separated | | Together | |
| --- | --- | --- | --- | --- | --- | --- | --- | --- |
| *ANGERS* | | | | | *LOPEX* | | | | |
|  | EWT | LMA | EWT | LMA | EWT | LMA | EWT | LMA |  |
| R | 0.00343 | 0.00224 | 0.00483 | 0.00143 | 0.00444 | 0.00313 | 0.00353 | 0.00434 |  |
| T | 0.00221 | 0.00213 | 0.00191 | 0.00191 | 0.00293 | 0.00354 | 0.00304 | 0.00964 |  |
| R & T | 0.00344 | 0.00214 | 0.00181 | 0.00344 | 0.00223 | 0.00234 | 0.00243 | 0.00424 |
